# Supplementary material
Source: Springer Nature journal article supplement (https://www.springermedizin.de/resource/supplementary/12958_2011_854_MOESM4_ESM.pdf/9569002)

**A****Western Blot- Primary hEEC****Total lysates**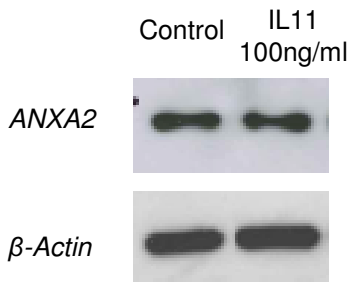**Membrane & Cytosol Fraction**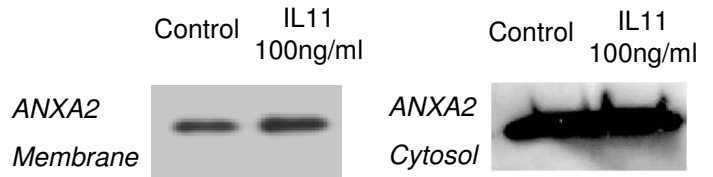**B****Western Blot- ECC-1  
(Membrane Fraction)**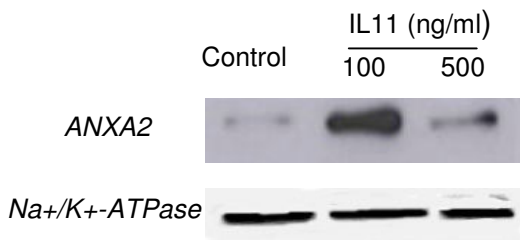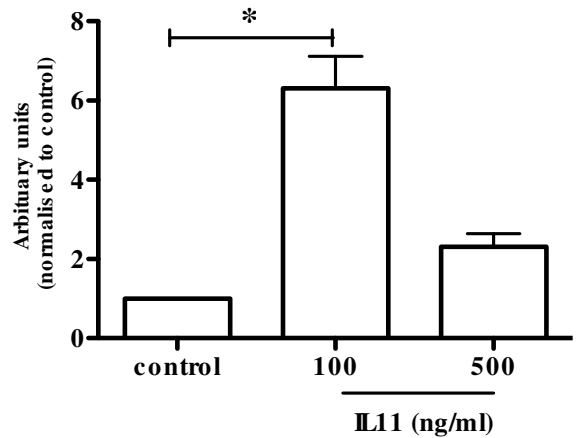**C****Western Blot- Ishikawa  
(Membrane Fraction)**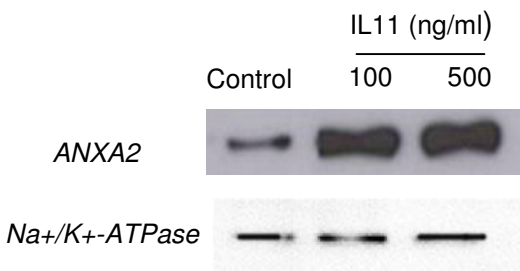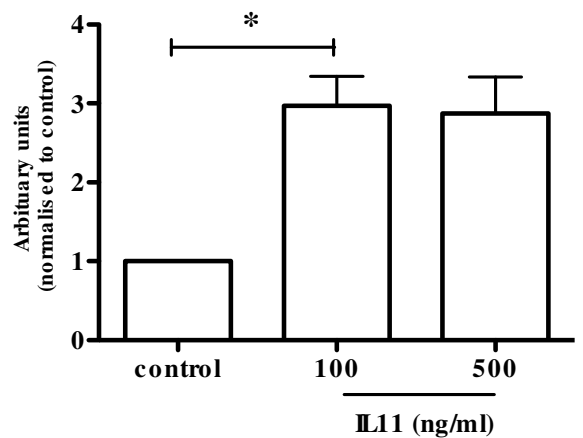

Supplement: MOESM4 [file 9569002]
